# Supplementary material
Source: publisher figshare collection journal article supplement (https://gsapubs.figshare.com/articles/dataset/_/19176278)

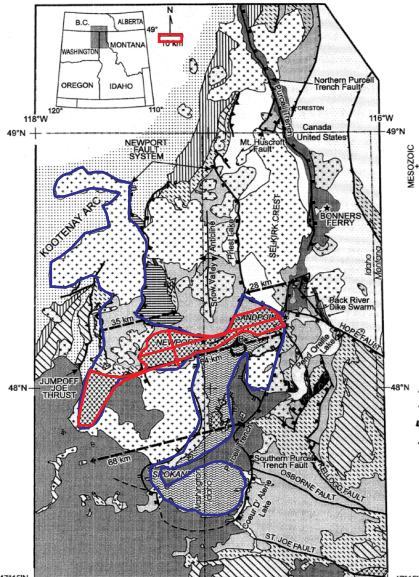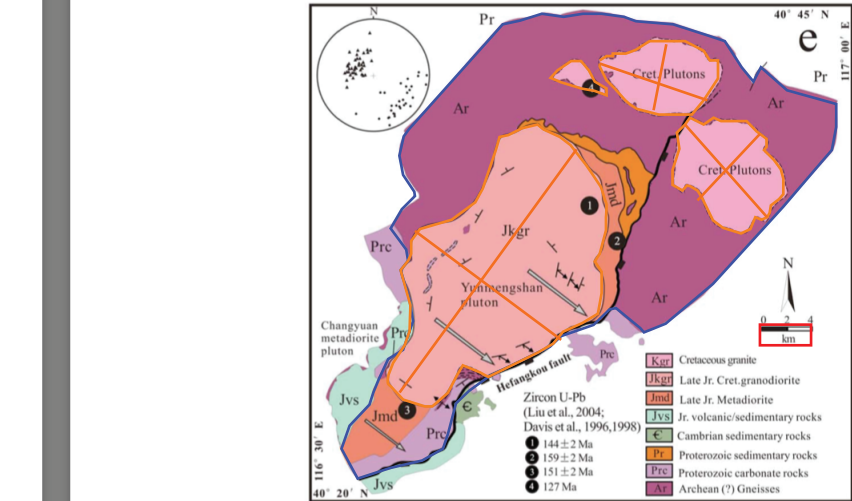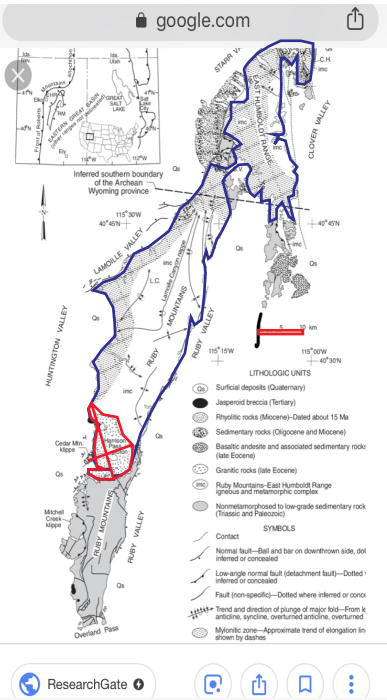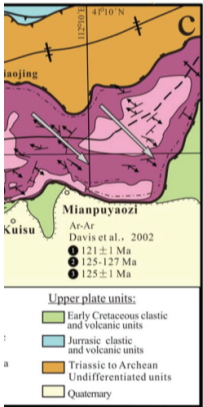

- Detachment fault
- Mylonitic fabric (brittle-ductile transition)
- Antiformal and synform defined by dip of detachment faults
- Antiformal axial trace

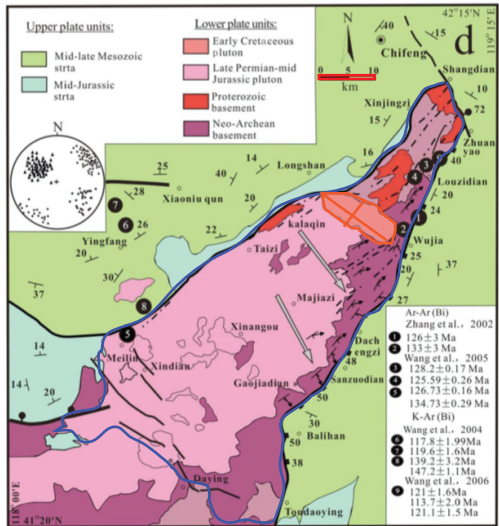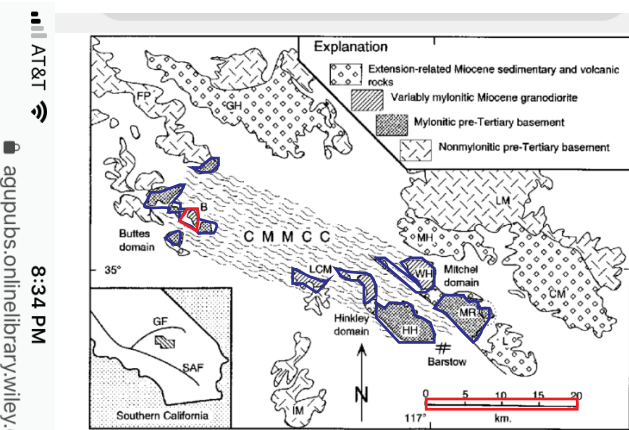

of the central Mojave metamorphic core complex ...

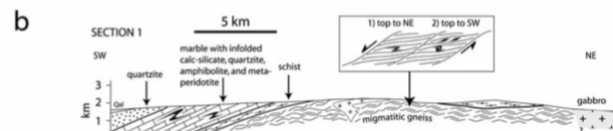

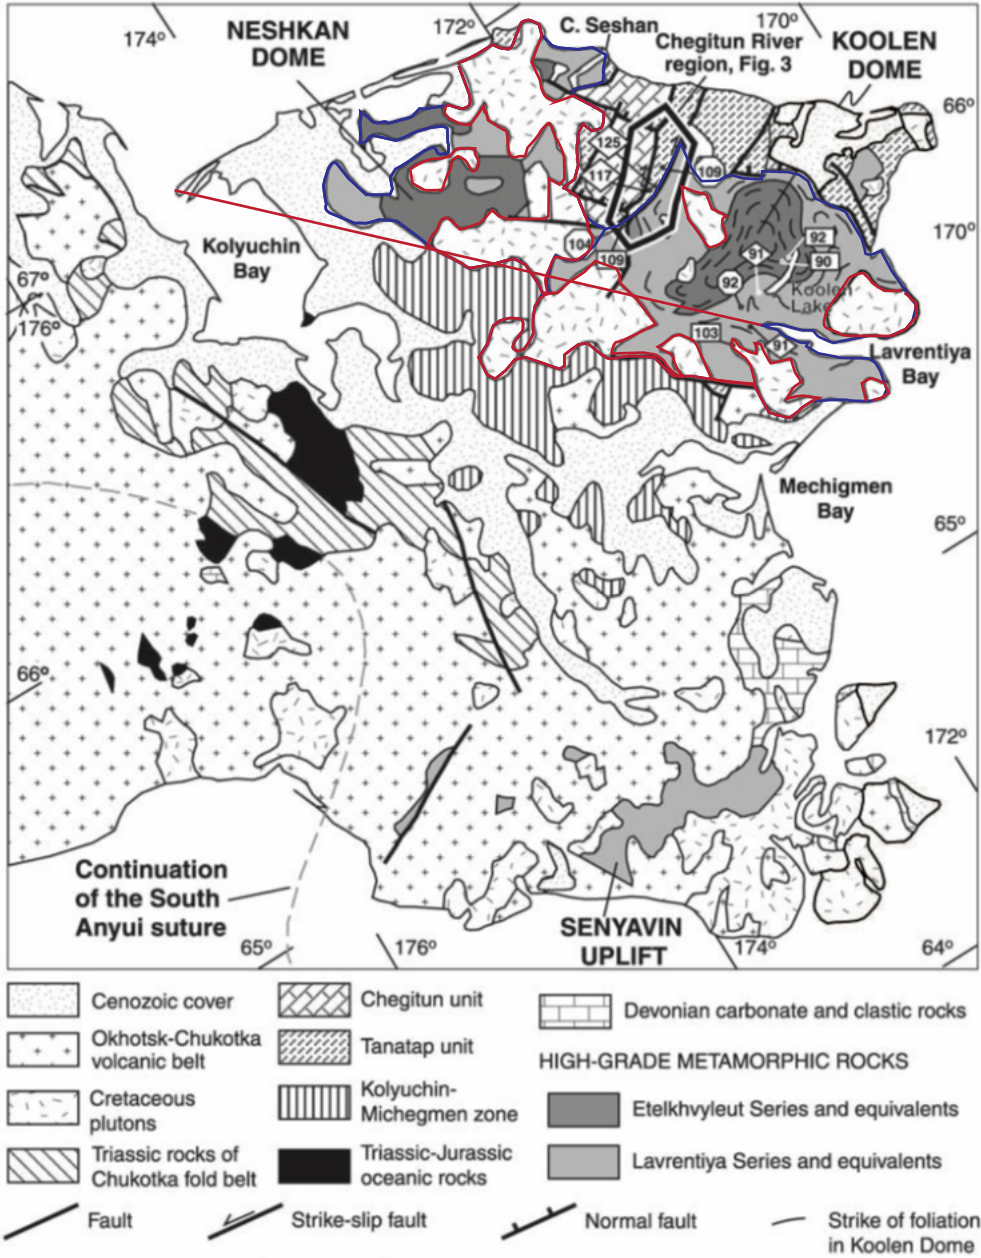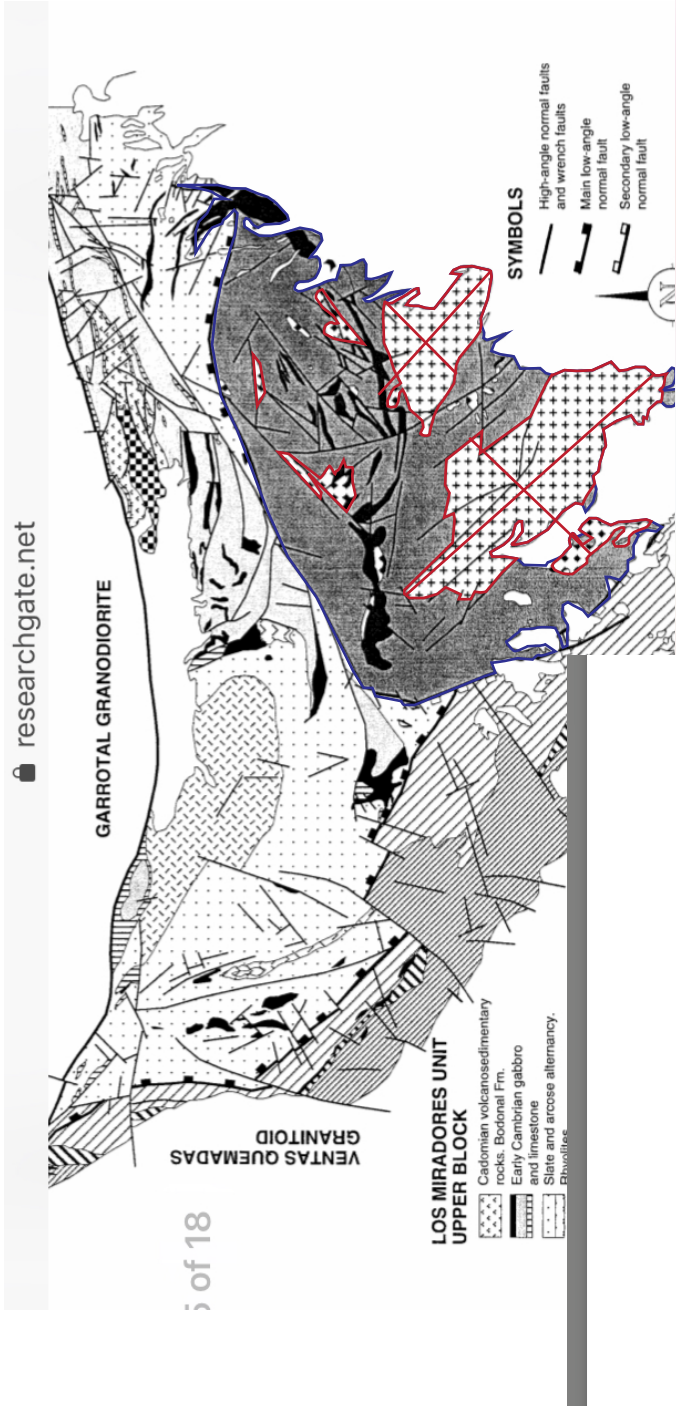

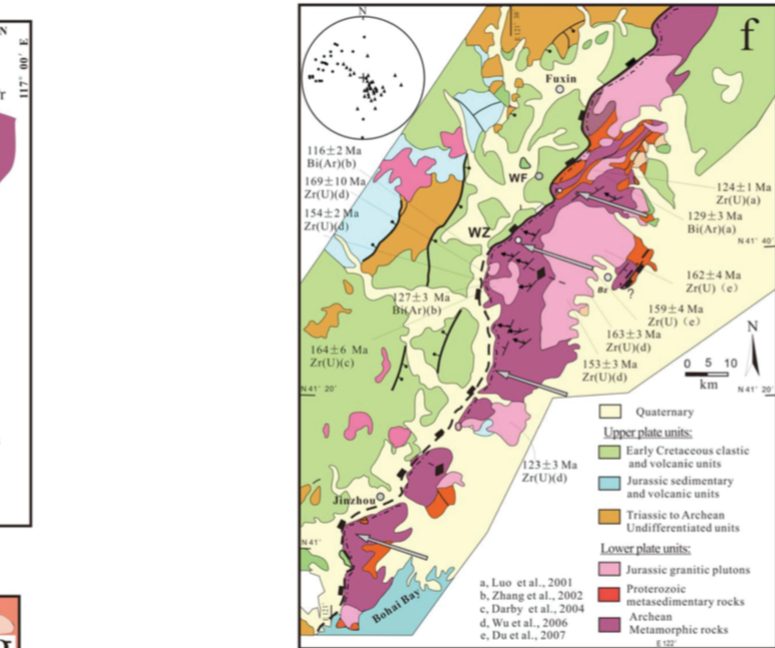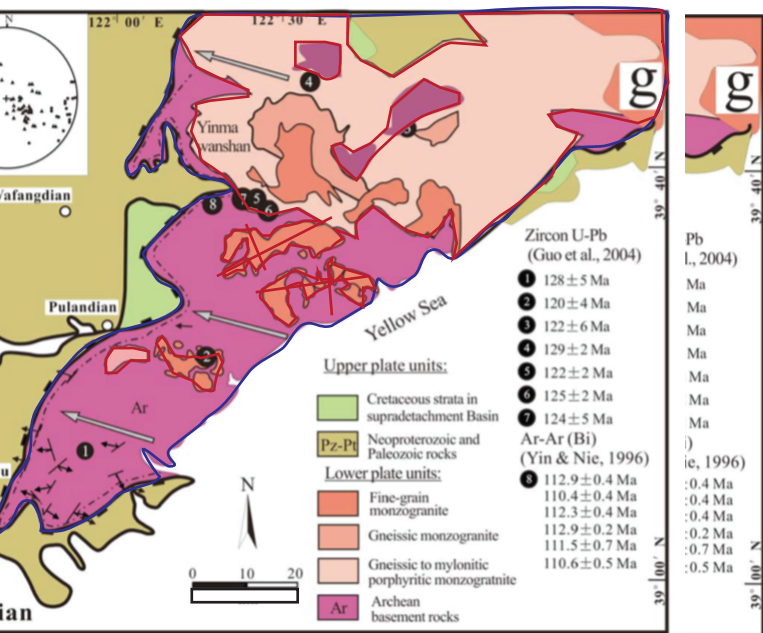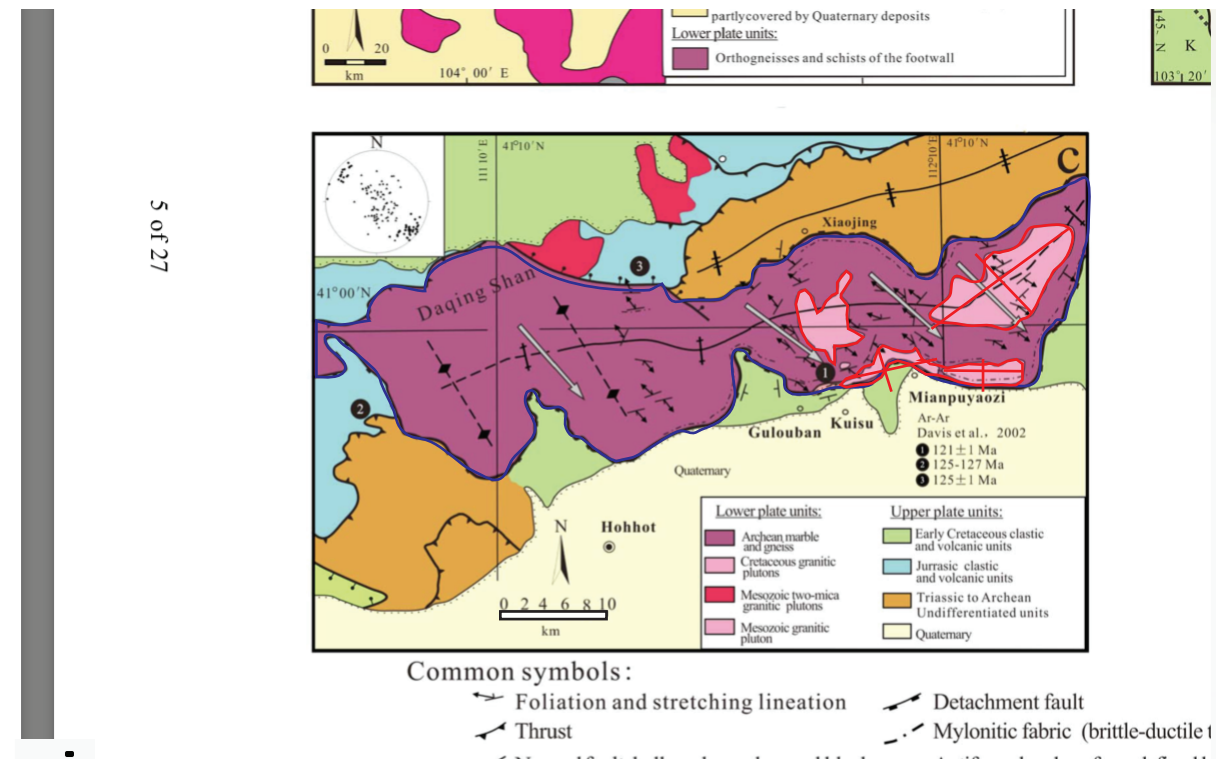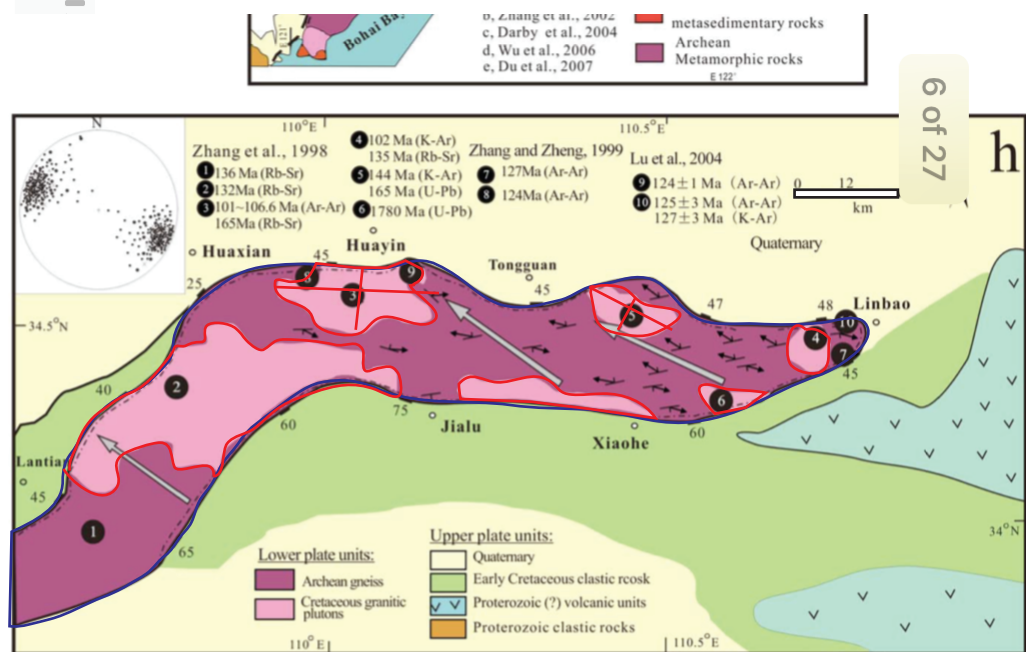

Figure 3. (continued)

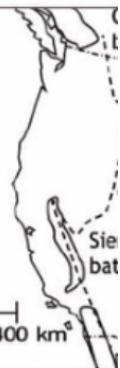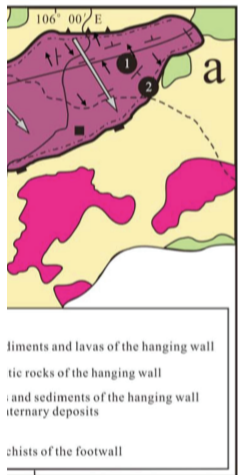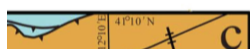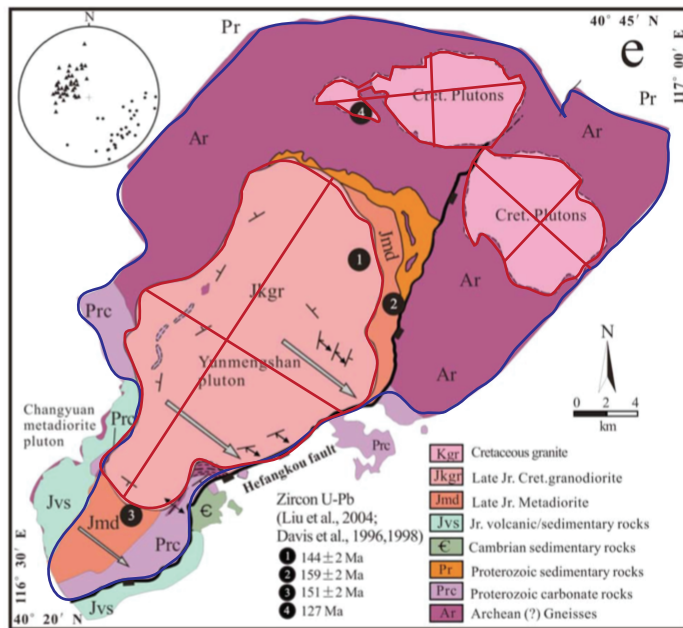

5 of 27

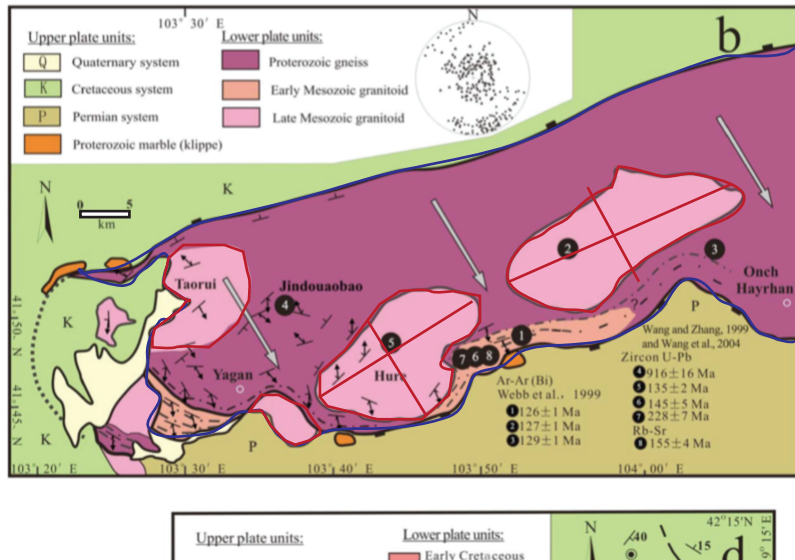

TC6007

WANG ET AL.: LATE M

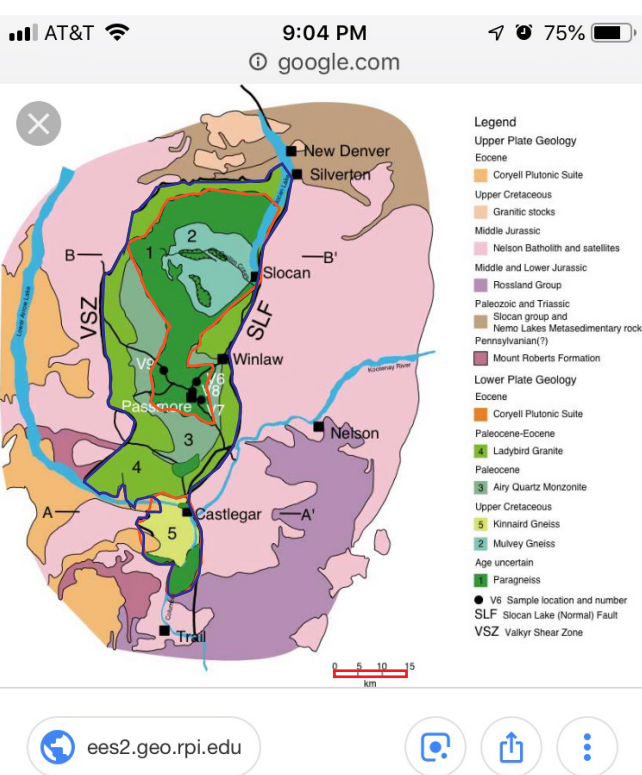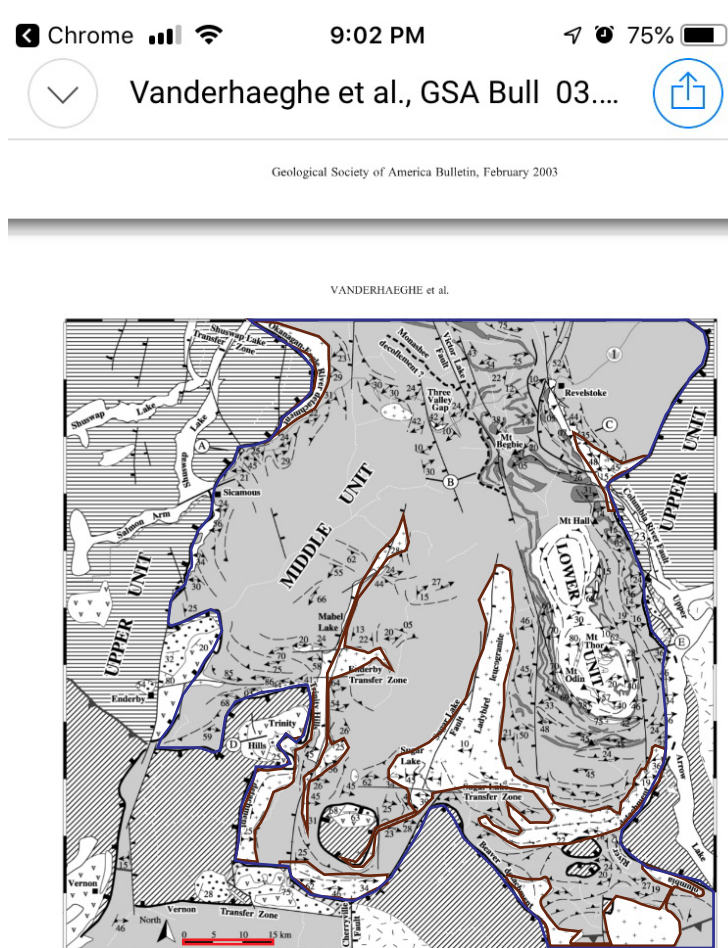

Uploaded by Olivier Vanderhaeghe

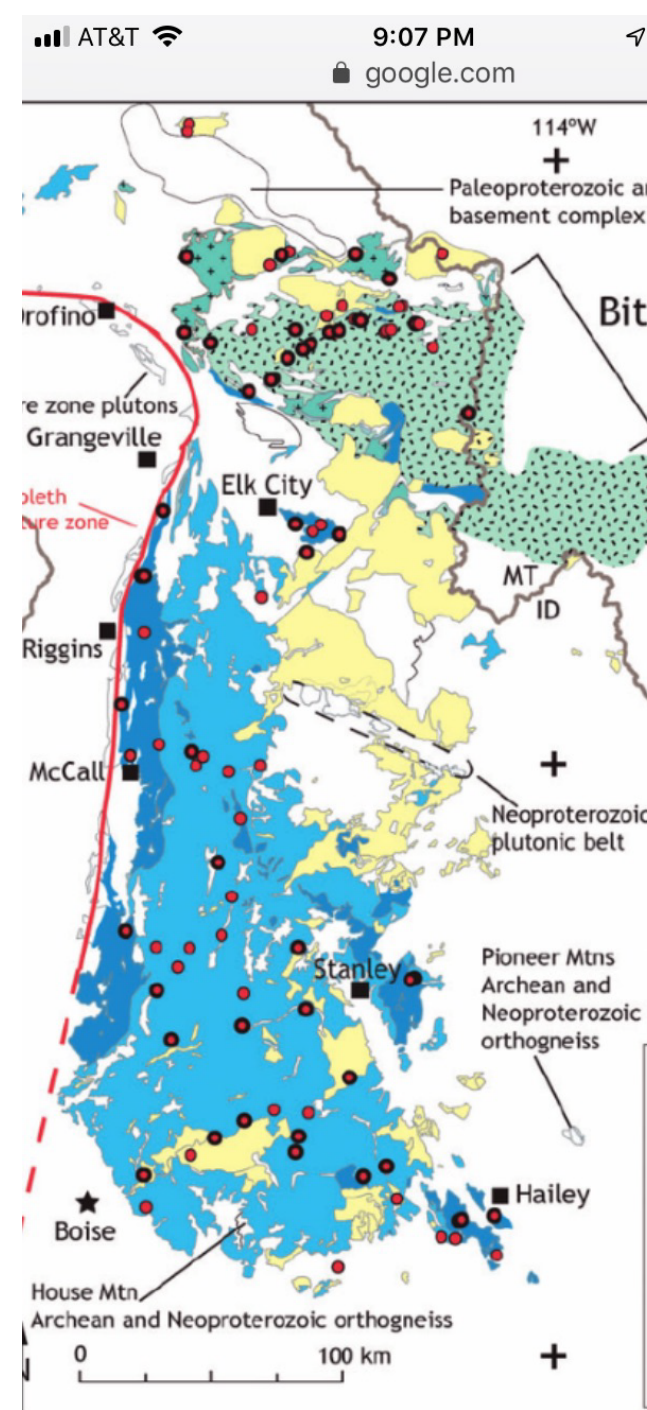

Supplement: Supplementary file 1 [file 1]
