# Supplementary material
Source: publisher figshare collection journal article supplement (https://gsapubs.figshare.com/articles/dataset/_/19176278)

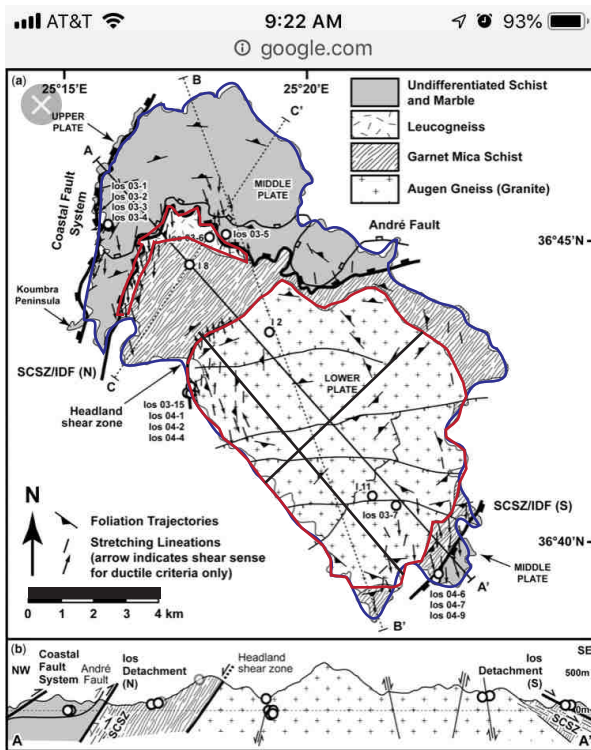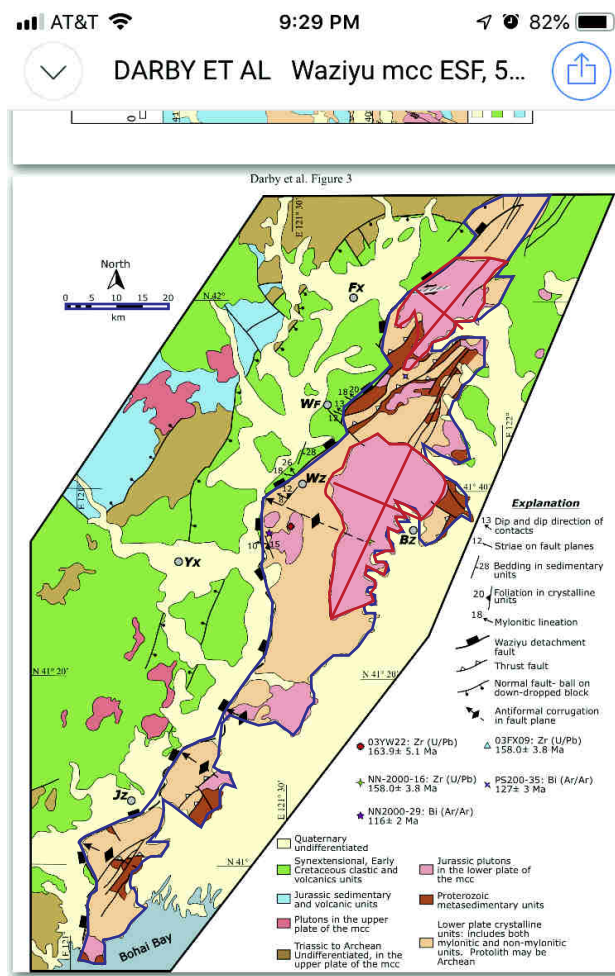

Uploaded by Gregory A Davis

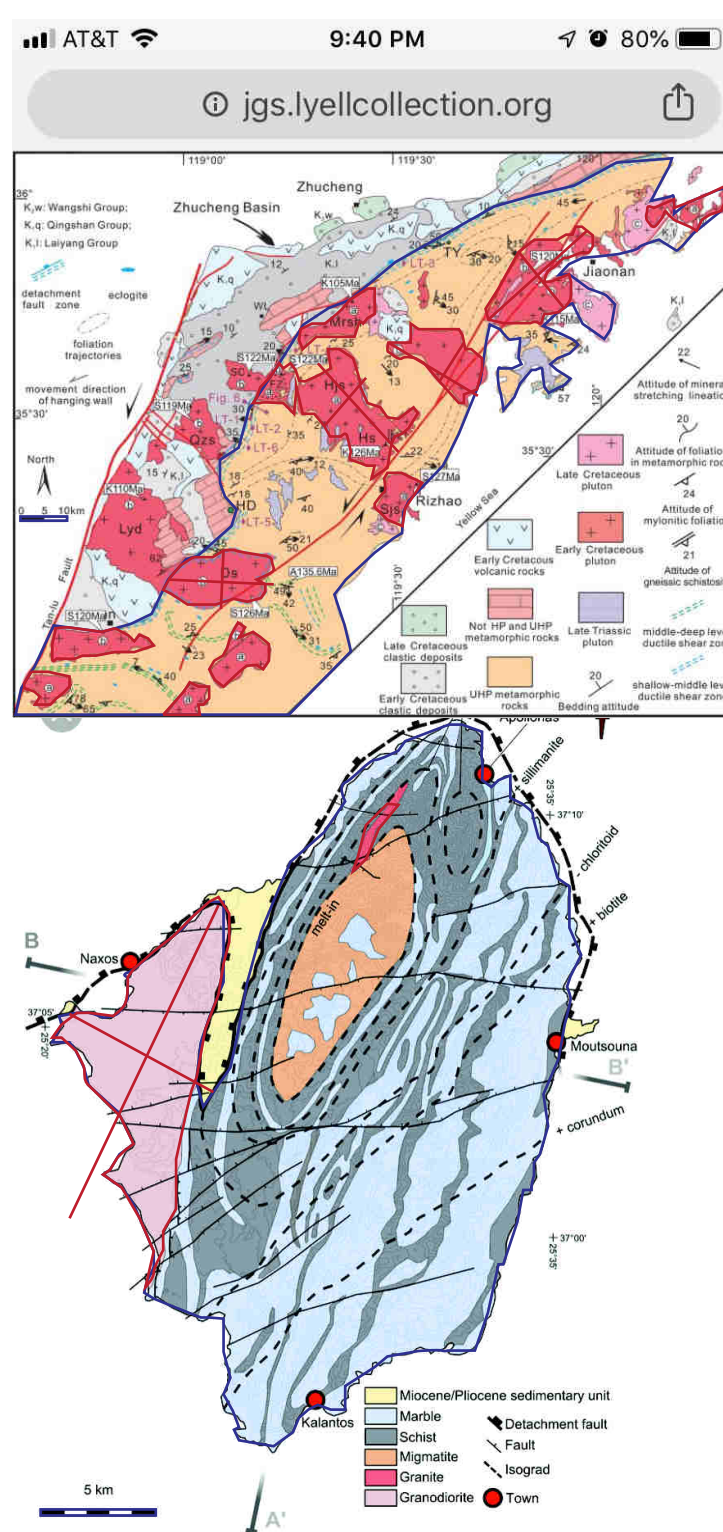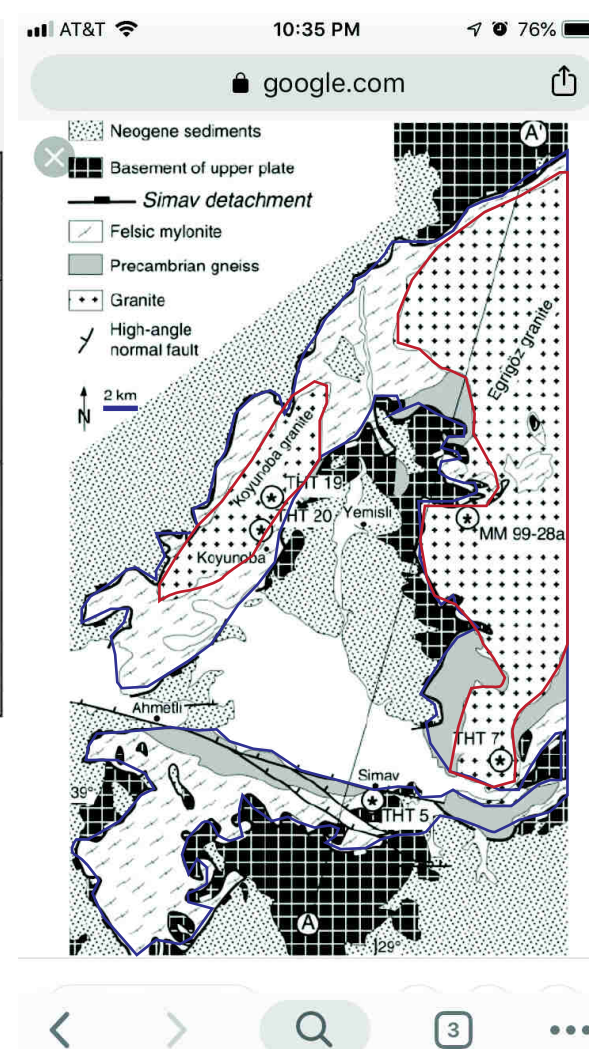

## Timing and nature of formation of the los metamorphic core

Download figure ...

Images may be subject to copyright. Learn More

**Supplemental Appendix 2b** for Konstantinou, A., 2022, The “death” of the Sevier-Laramide orogen: Gravitational collapse of the crust or something else?, *in* Craddock, J.P., Malone, D.H., Foreman, B.Z., and Konstantinou, A., eds., Tectonic Evolution of the Sevier-Laramide Hinterland, Thrust Belt, and Foreland, and Postorogenic Slab Rollback (180–20 Ma): Geological Society of America Special Paper 555, [https://doi.org/10.1130/2021.2555\(15\)](https://doi.org/10.1130/2021.2555(15)).

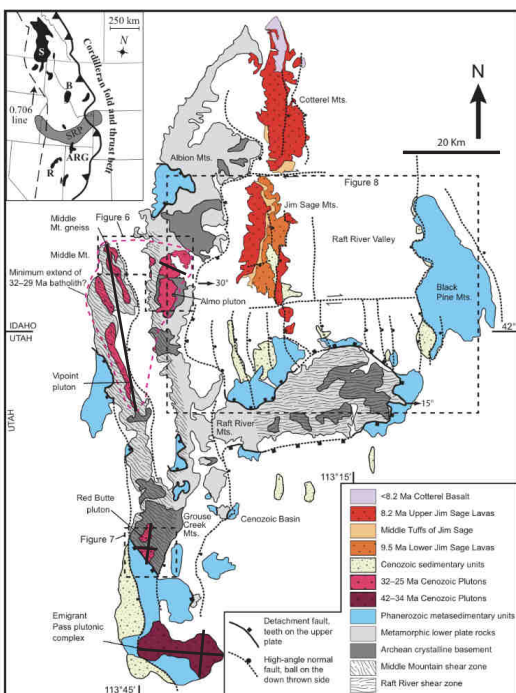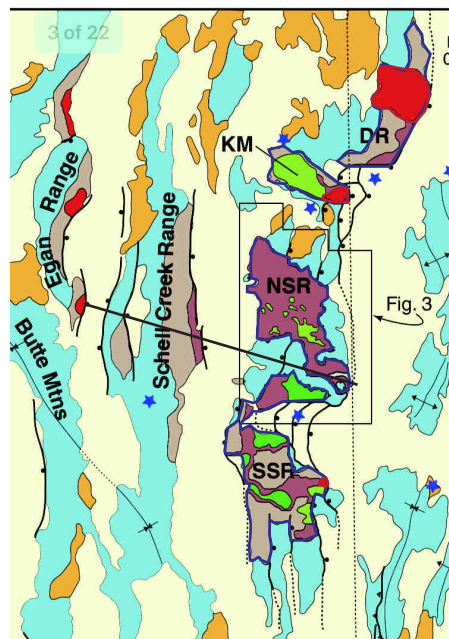

OPEN IN...

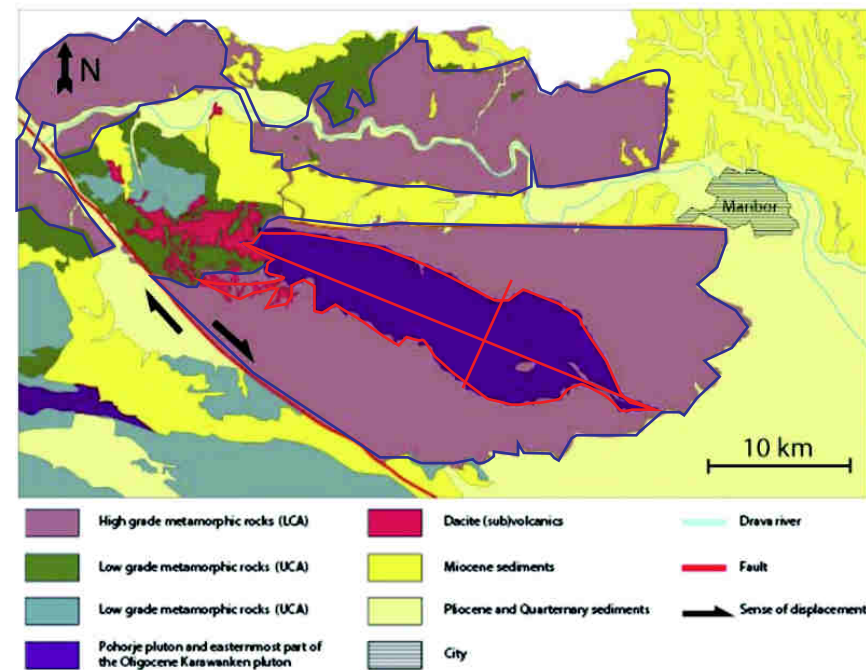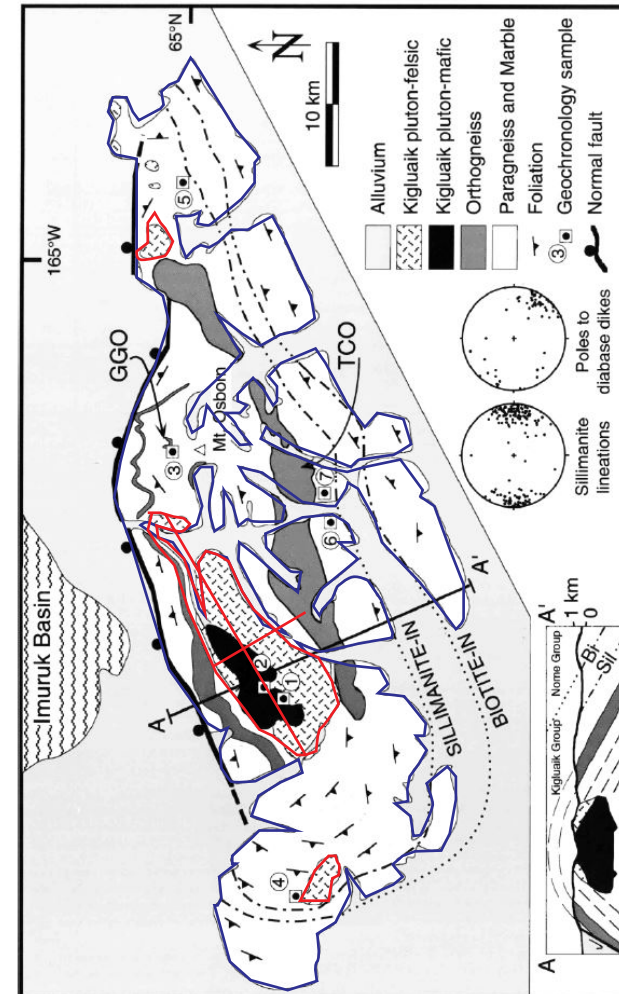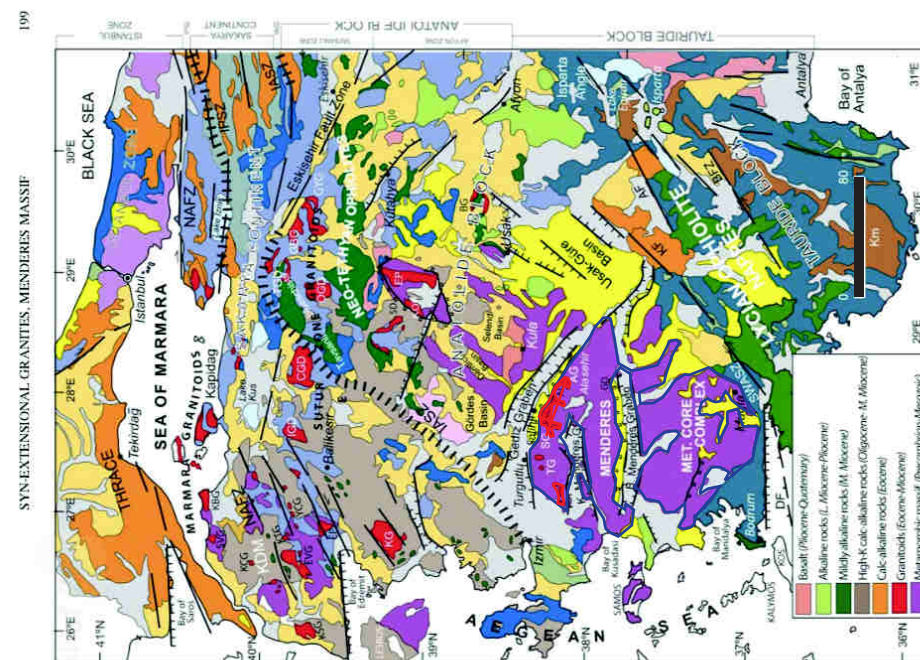

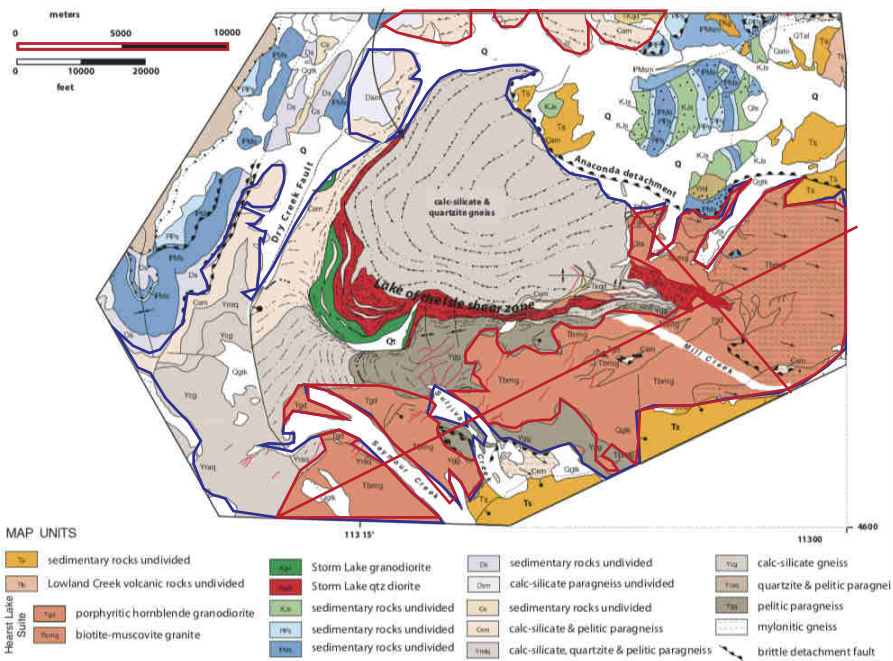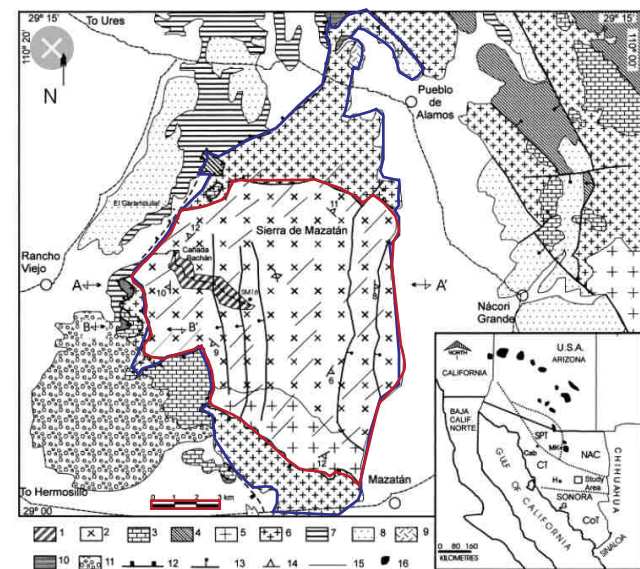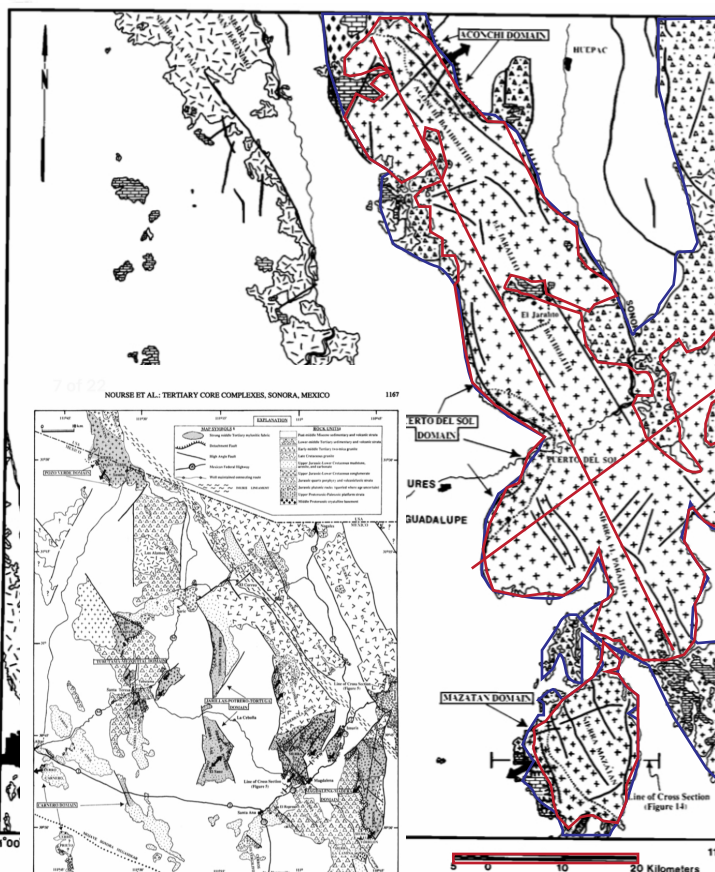

Figure 3. Geologic map showing core complexes developed in the southern Papago block. Solid black arrows indicate direction of upper plate detachment recorded by lower plate fabrics. Structural data from the five designated lower plate mylonite domains are presented in Figures 6-10. **MYLONITE DANCING FORMATION.** Solid black arrows infer direction of upper plate detachment. Structural data from the Puerto del Sol and Mazatan mylonite domains are presented in Figures 12 and 15, respectively.

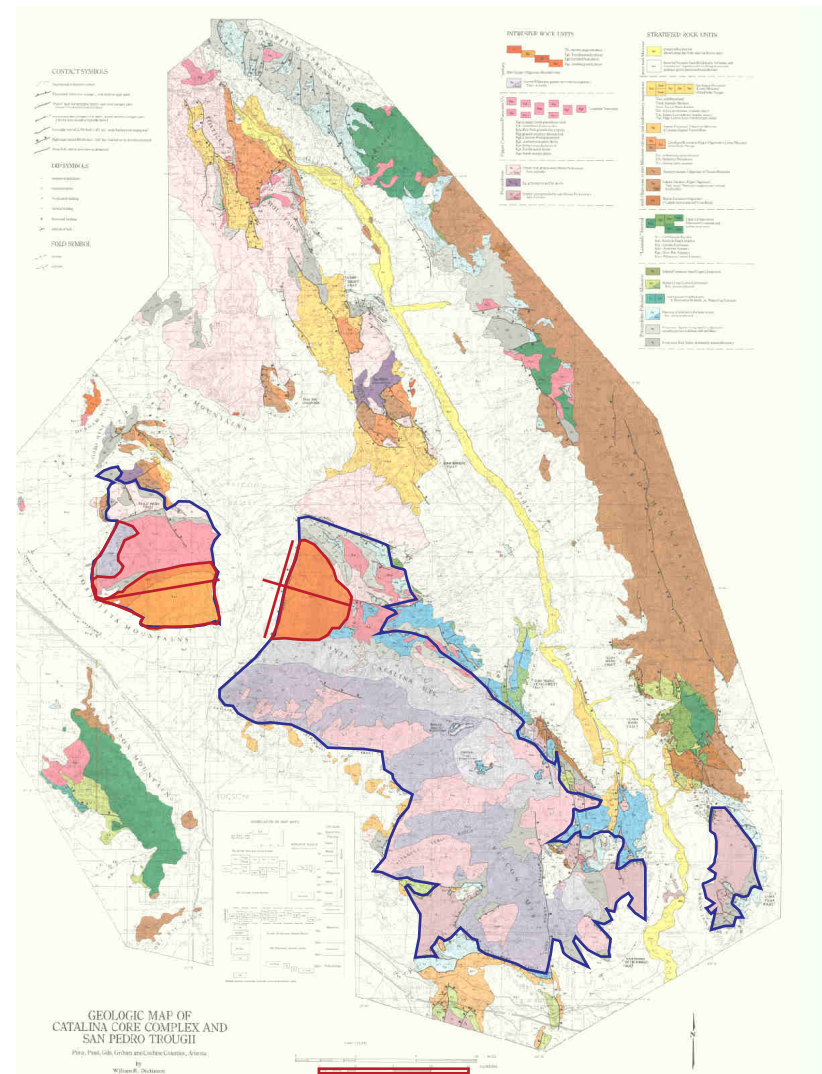

Hermosillo, within coordinates 110° 00' to 110° 20' W and 29° 15' to 29° 30' N. It covers almost the complete 1:50,000 topographic chart H12D33 edited by INEGI (2004) and includes the El Pajarito and El Batamote sierras in its eastern and southern parts, respectively (Figure 2).

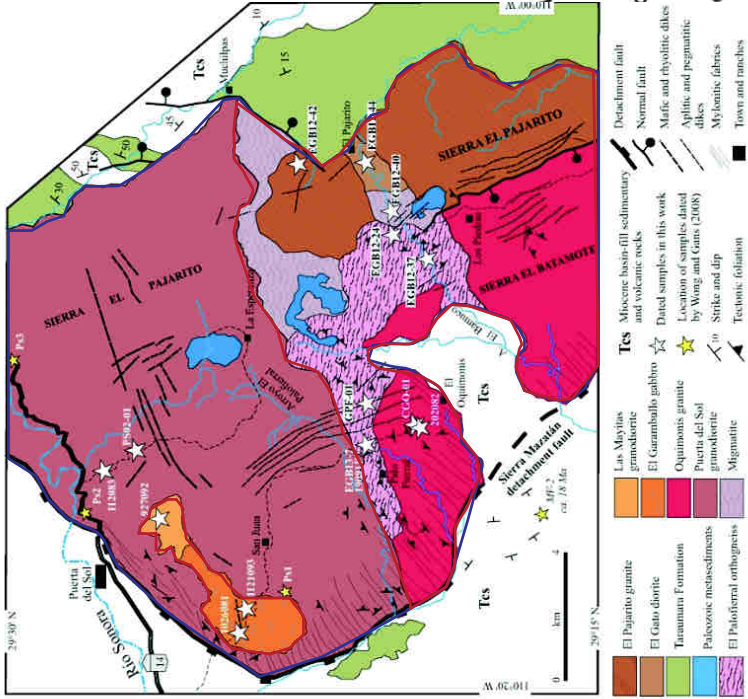

Figure 2 Geologic map of the Puerta del Sol area. Simplified from cartography to the scale 1:50,000 by González Becuar (2013).

The geology of the area was first reported by Radelli (1986) in a general map where he recognized and named some of the plutons that are herein described in detail. Radelli (1986) named the El Pajarito, El Oquirrimo, Garambullo, and Las Mayitas plutons, and his nomenclature is followed in this paper. Anderson et al. (1980) named the Puerta del Sol granodiorite and reported a U-Pb age of  $57 \pm 2$  Ma for this pluton. In addition to these plutons, we recognized the El Paleoferral orthogneiss, El Gato diorite, and the

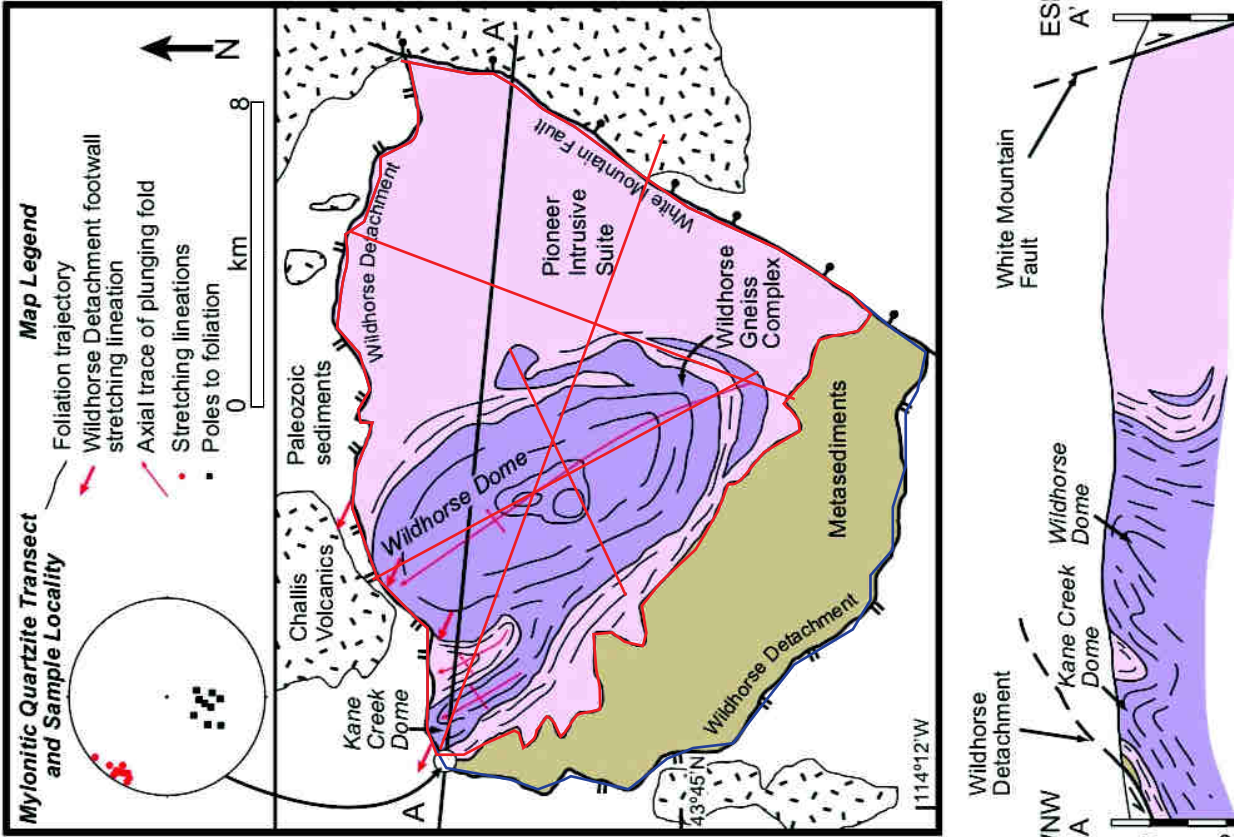

Supplement: Supplementary file 3 [file 1]
